# Supplementary material for: Neutrophils preferentially phagocytose elongated particles—An opportunity for selective targeting in acute inflammatory diseases
Source: PubMed Central journal article supplement — Sci Adv. 2020 Jun 10;6(24):eaba1474. doi: 10.1126/sciadv.aba1474 (PMC7286665; doi:10.1126/sciadv.aba1474), 2020-06-10
Supplement: aba1474_SM.pdf [file aba1474_SM.pdf]

## Supplementary Materials for

### **Neutrophils preferentially phagocytose elongated particles—An opportunity for selective targeting in acute inflammatory diseases**

Hanieh Safari, William J. Kelley, Eiji Saito, Nicholas Kaczorowski, Lauren Carethers,  
Lonnie D. Shea, Omolola Eniola-Adefeso\*

\*Corresponding author. Email: [lolaa@umich.edu](mailto:lolaa@umich.edu)

Published 10 June 2020, *Sci. Adv.* **6**, eaba1474 (2020)  
DOI: [10.1126/sciadv.aba1474](https://doi.org/10.1126/sciadv.aba1474)

#### **This PDF file includes:**

Tables S1 to S3  
Figs. S1 to S7

## Supplementary Materials

**Table S1. The dimensions of polystyrene particles of different aspect ratios and sizes measured from SEM images.**

| Aspect ratio | Equivalent Spherical Diameter (ESD) |                 |                              |                  |                             |                             |
|--------------|-------------------------------------|-----------------|------------------------------|------------------|-----------------------------|-----------------------------|
|              | 500 nm                              |                 | 1 $\mu\text{m}$              |                  | 2 $\mu\text{m}$             |                             |
|              | Major axis                          | Minor axis      | Major axis                   | Minor axis       | Major axis                  | Minor axis                  |
| 2            | 820 $\pm$ 110 nm                    | 450 $\pm$ 51 nm | 1.9 $\pm$ 0.7 $\mu\text{m}$  | 830 $\pm$ 85 nm  | 5.0 $\pm$ 0.5 $\mu\text{m}$ | 1.4 $\pm$ 0.1 $\mu\text{m}$ |
| 4            | 1.15 $\pm$ 0.2 $\mu\text{m}$        | 340 $\pm$ 50 nm | 3.0 $\pm$ 0.35 $\mu\text{m}$ | 740 $\pm$ 100 nm | 6.1 $\pm$ 0.7 $\mu\text{m}$ | 1.3 $\pm$ 0.1 $\mu\text{m}$ |
| 6            | 2.0 $\pm$ 0.5 $\mu\text{m}$         | 300 $\pm$ 48 nm | 3.9 $\pm$ 0.6 $\mu\text{m}$  | 650 $\pm$ 90 nm  | 9.2 $\pm$ 3 $\mu\text{m}$   | 1.5 $\pm$ 0.5 $\mu\text{m}$ |

**Table S2. The theoretical dimensions of polystyrene particles of different aspect ratios if they were perfect spheroids.**

| Aspect ratio | Equivalent Spherical Diameter (ESD) |            |                   |            |                   |                    |
|--------------|-------------------------------------|------------|-------------------|------------|-------------------|--------------------|
|              | 500 nm                              |            | 1 $\mu\text{m}$   |            | 2 $\mu\text{m}$   |                    |
|              | Major axis                          | Minor axis | Major axis        | Minor axis | Major axis        | Minor axis         |
| 2            | 800 nm                              | 400 nm     | 1.6 $\mu\text{m}$ | 800 nm     | 3.2 $\mu\text{m}$ | 1.6 $\mu\text{m}$  |
| 4            | 1.25 $\mu\text{m}$                  | 300 nm     | 2.5 $\mu\text{m}$ | 630 nm     | 5 $\mu\text{m}$   | 1.25 $\mu\text{m}$ |
| 6            | 1.65 $\mu\text{m}$                  | 280 nm     | 3.3 $\mu\text{m}$ | 550 nm     | 6.6 $\mu\text{m}$ | 1.1 $\mu\text{m}$  |

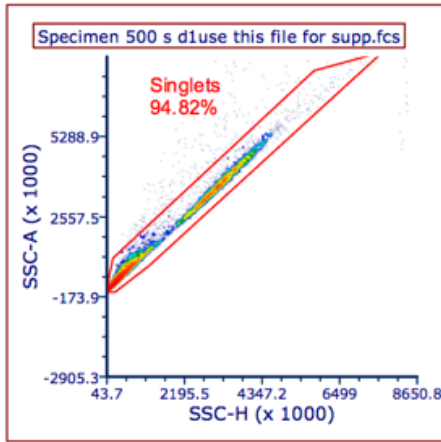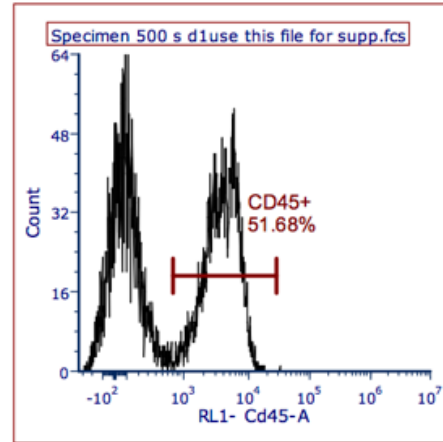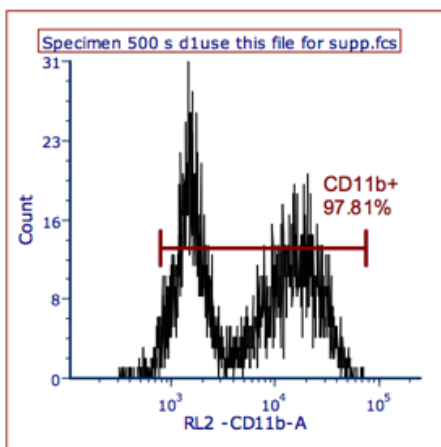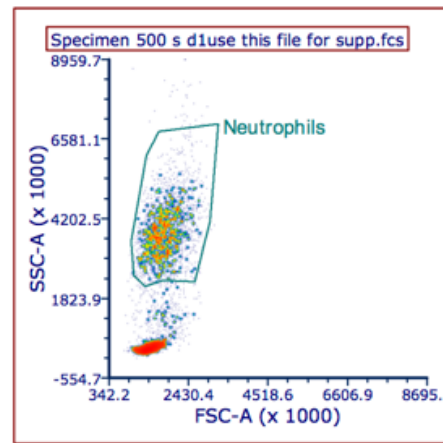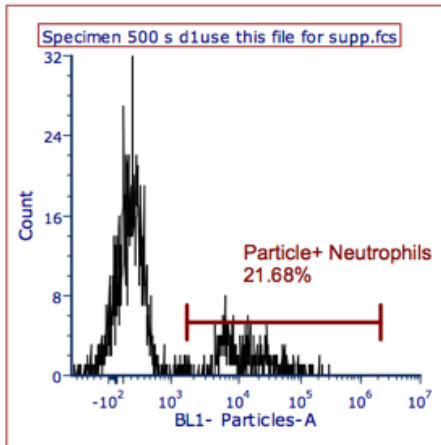

**Fig. S1. Representative gating of particle-positive human neutrophils via flow cytometry using FCS express software - 500 nm particles shown here.**

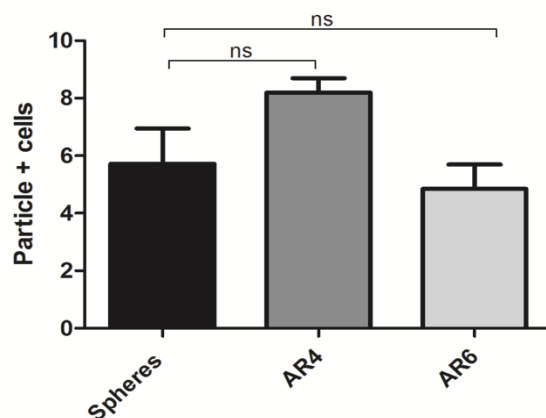

**Fig. S2.** Representation of the minimal uptake of the particles with equivalent spherical diameter of 500 nm by primary human neutrophils in whole blood with particle concentration set at  $10^7$  particle/ml of blood.

**Table S3.** Zeta potential measurements of polystyrene AR6 rods and spheres of different sizes fabricated via heat stretching technique.

| Equivalent Spherical Diameter (ESD) | Spheres            | AR6 Rods           |
|-------------------------------------|--------------------|--------------------|
| 500 nm                              | $-45.0 \pm 5.2$ mV | $-26.4 \pm 5.2$ mV |
| 1 $\mu$ m                           | $-44.3 \pm 5.0$ mV | $-21.8 \pm 3.9$ mV |
| 2 $\mu$ m                           | $-41.4 \pm 5.1$ mV | $-29.7 \pm 6.0$ mV |

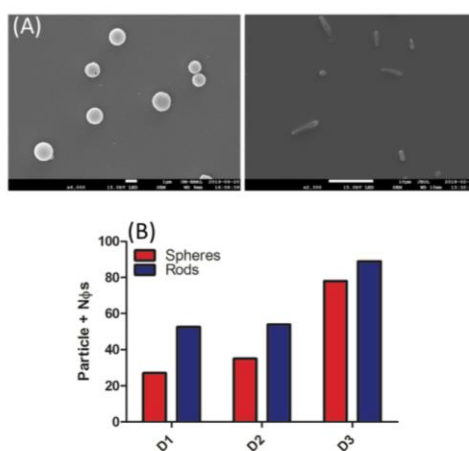

**Fig. S3.** *Ex vivo* uptake of PLGA rods and spheres by primary human neutrophils. (A) SEM image of the Cy5.5-loaded PLGA spheres and AR6 rods with the equivalent spherical diameter of 1.5- $\mu$ m fabricated via the two-step emulsion solvent evaporation technique, and (B) uptake of the PLGA rods and spheres by primary human neutrophils separated for individual donors. The particle concentration in blood was set at  $5 \times 10^6$  particles/ml, and the uptake study was performed for 30 minutes.

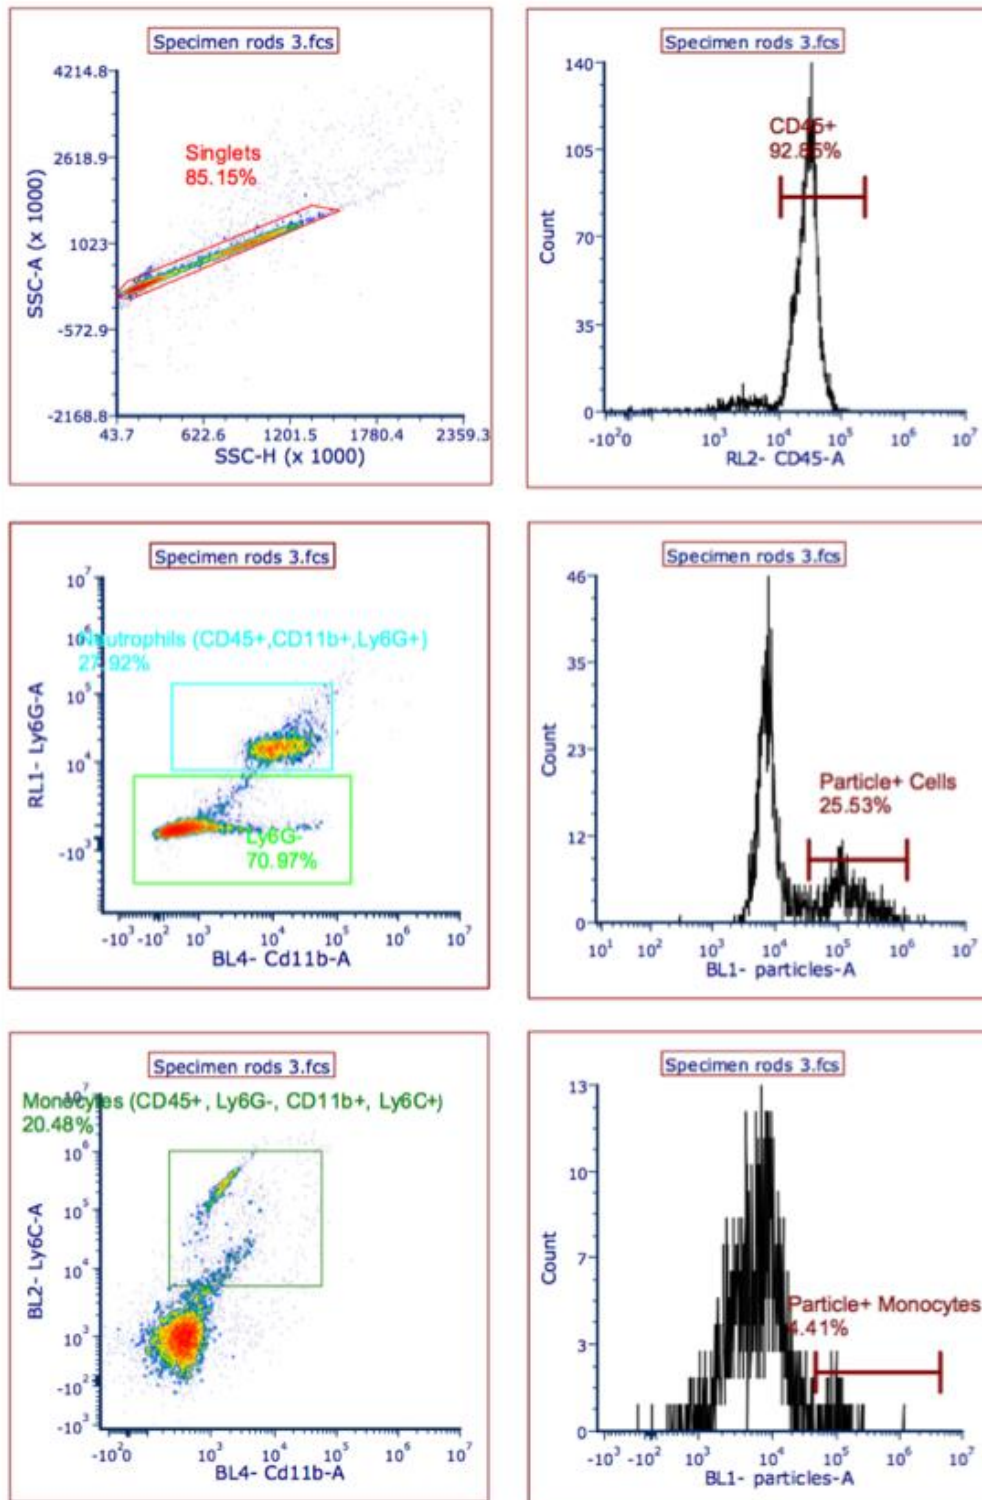

**Fig. S4. Representative flow-cytometry panels for gating mouse neutrophils and monocytes in uptake assays – 500 nm particles shown here.** After gating the singlets, neutrophils can be identified as CD45+, CD11b+, and Ly6G+ cells, and monocytes can be identified as CD45+, Ly6G-, CD11b+, and Ly6C+ cells. Particle+ cells are identified as the population of the cells, which are positive for the FITC signal.

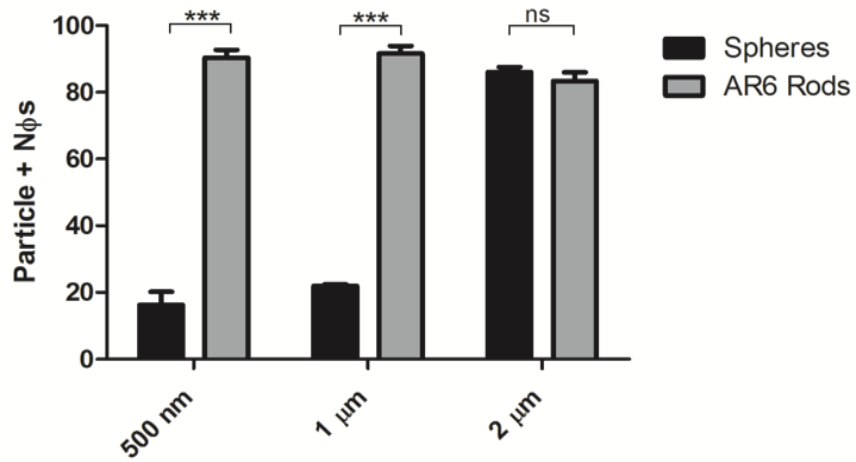

**Fig. S5. Uptake of the polystyrene AR6 rods and spheres of different sizes via SJL/J mouse strain after 2-hr incubation of the particles in whole blood.** The concentration of the particles in blood was set at  $10^7$  cells/ml.

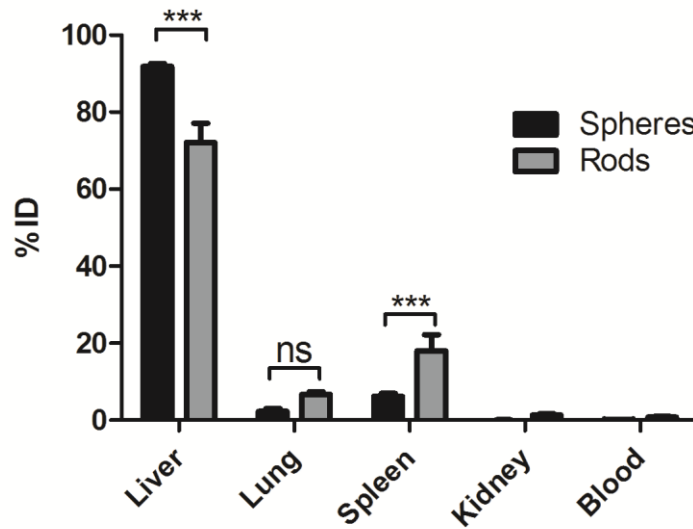

**Fig. S6. Biodistribution of 500 nm spheres and AR6 rods in 6-8 weeks old male BALB/c mice following 30 min circulation.**  $5 \times 10^8$  particles were injected per animal.

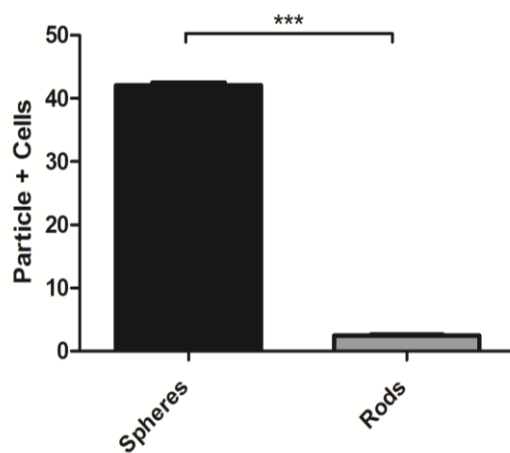

**Fig. S7. Uptake of the 500 nm spheres and AR6 rods of the same volume by rat alveolar macrophages.** The concentration of the cells and particles were respectively set at  $10^6$  cells/ml and  $10^8$  particles/ml.
